# Supplementary material for: Diotic and Dichotic Mechanisms of Discrimination Threshold in Musicians and Non-Musicians
Source: MDPI journal article supplement (doi:10.3390/brainsci11121592), 2021-11-30
Supplement: s1 [file s1]

Supplementary Table S1.

| Supplementary Table S1. Shapiro-Wilk Tests of normality for threshold measures by stimulus type |               |           |    |      |
|-------------------------------------------------------------------------------------------------|---------------|-----------|----|------|
| Metric                                                                                          | Group         | Statistic | df | Sig. |
| Dich. Pitch DLF                                                                                 | Non-musicians | .883      | 18 | .029 |
|                                                                                                 | Musicians     | .952      | 20 | .487 |
| Pure Tone DLF                                                                                   | Non-musicians | .924      | 18 | .155 |
|                                                                                                 | Musicians     | .952      | 20 | .395 |
| Itr. Rip. Noise DLF                                                                             | Non-musicians | .861      | 18 | .013 |
|                                                                                                 | Musicians     | .902      | 20 | .045 |
| Comp. Tone DLF                                                                                  | Non-musicians | .901      | 18 | .059 |
|                                                                                                 | Musicians     | .957      | 20 | .487 |
| SR Musical Skill                                                                                | Non-musicians | .737      | 18 | .000 |
|                                                                                                 | Musicians     | .796      | 20 | .001 |
| BRAMS Avg./Total                                                                                | Non-musicians | .959      | 18 | .583 |
|                                                                                                 | Musicians     | .970      | 20 | .758 |

Supplementary Table S2.

| Supplementary Table S2. Mean threshold and within-session change measures by stimulus type in Non-musicians and Musicians |           |                                                                  |               |                     |                |                                       |              |              |          |                                                       |                        |                        |                    |
|---------------------------------------------------------------------------------------------------------------------------|-----------|------------------------------------------------------------------|---------------|---------------------|----------------|---------------------------------------|--------------|--------------|----------|-------------------------------------------------------|------------------------|------------------------|--------------------|
| Group                                                                                                                     | Metric    | Mean discriminant frequency threshold over four consecutive runs |               |                     |                | Within-session variation in threshold |              |              |          | Within-session threshold shift from first to last run |                        |                        |                    |
|                                                                                                                           |           | Dich. Pitch DLF                                                  | Pure Tone DLF | Itr. Rip. Noise DLF | Comp. Tone DLF | Dich. Pitch SD                        | Pure Tone SD | Itr. Rip. SD | Comp. SD | Dich. Pitch $\Delta$ DLF                              | Pure Tone $\Delta$ DLF | Itr. Rip. $\Delta$ DLF | Comp. $\Delta$ DLF |
| Non-musicians (n=18)                                                                                                      | Mean      | 14.49                                                            | 6.76          | 5.16                | 3.90           | 4.72                                  | 2.98         | 1.43         | 1.02     | .35                                                   | -1.05                  | .34                    | -.19               |
|                                                                                                                           | Std. Dev. | 8.86                                                             | 3.44          | 1.81                | 1.69           | 3.80                                  | 2.30         | 2.07         | .75      | 6.67                                                  | 5.66                   | 2.57                   | 1.26               |
| Musicians (n=20)                                                                                                          | Mean      | 5.79                                                             | 2.70          | 4.04                | 2.19           | 2.15                                  | 1.12         | .92          | .65      | 1.29                                                  | -.04                   | -.16                   | .06                |
|                                                                                                                           | Std. Dev. | 1.79                                                             | .99           | .80                 | .79            | 1.27                                  | 1.33         | 1.08         | .41      | 3.50                                                  | 1.87                   | 1.18                   | .85                |

[illegible]
